# Supplementary material for: Results from a Multi-Laboratory Ocean Metaproteomic Intercomparison: Effects of LC-MS Acquisition and Data Analysis Procedures
Source: Copernicus journal article supplement (doi:10.5194/egusphere-2023-3148), 2024-01-16
Supplement: Supplementary file 1 [file egusphere-2023-3148-supplement.pdf]

## 1 Supplemental Materials

### 2 Supplemental Methods

#### 3 *Informatic Intercomparison Methodologies*

4  
5  
6  
7 **Lab 109:** The raw files were searched against the metagenomic database employing a 2 round  
8 search using PEAKS Studio X. The initial database search was performed to focus the  
9 metagenomic database for protein sequences with peptide sequence matches at 5% FDR. The  
10 focused database was further used for a second round search, which allowed a parent mass  
11 error tolerance of 10.0 ppm and a fragment mass error tolerance of 0.6 Da. The search  
12 considered up to 3 missed cleavages, carbamidomethylation as fixed and methionine oxidation  
13 and N-terminal acetylation as variable modifications. The cRAP protein sequences  
14 (<http://ftp.thegpm.org/fasta/cRAP/>) were included as contaminant database. Finally, PSMs were  
15 filtered for 1% FDR and annotated with taxonomic lineages (obtained from the metagenomic  
16 experiments). Non-unique peptide matches were annotated with the LCA of the respective  
17 lineages.

18 **Lab 321:** SearchGUI (Galaxy Version 3.3.10.1) was used to search using multiple search  
19 algorithms (X!Tandem, MS-GF+ and Comet). For each search algorithm, Precursor Tolerance  
20 of 10.0 ppm, Fragment Ion Tolerance of 0.6 Da and trypsin was used as an enzyme for  
21 proteolytic cleavage. Searches were performed allowing for two missed cleavages fixed  
22 modification of Carbamidomethylation at cysteine and Variable Modifications of Acetylation of  
23 protein N-term and Oxidation of Methionine. PeptideShaker (Version: 1.16.36) was used to filter  
24 peptides with the length of 8-50 aas and a precursor m/z tolerance of 10.0 ppm. Detected  
25 Peptide-spectral matches, peptides and proteins were reported at 1% global FDR. All of the  
26 analysis was performed within Galaxy platform.

27 **Lab 321:** MaxQuant (Galaxy version 1.6.17.0+galaxy3) was used to search the datasets. A  
28 fixed modification of Carbamidomethylation at cysteine and Variable Modifications of Acetylation  
29 of protein N-term and Oxidation of Methionine was applied along with allowing for two missed  
30 cleavages. The detection peptides and proteins were reported at 1% FDR.

31 **Lab 362:** The raw files were converted using ThermoRawFileParserGUI (version 1.4.1) to peak  
32 lists (.mgf files) using “native Thermo library peak picking” as the peak picking option and  
33 “Ignore missing instrument properties” as the error option. The peak lists (.mgf files) obtained  
34 from MS/MS spectra were identified using X! Tandem version X! Tandem (Vengeance version  
35 2015.12.1) using SearchGUI version 4.1.0. Here, the parameters provided and suggested by  
36 the study were used: tolerances of 10 ppm for MS1 and 0.6 Dalton for MS/MS; dynamic  
37 modifications: oxidation of M, and Acetyl on N-terminus; static modifications: Carbamidomethyl  
38 of C. Identification was conducted against a concatenated target/decoy database of the  
39 provided database (Intercal\_ORFs\_prodigal\_metagenemark\_Abbreviated-IDs.fasta).

40 The X!Tandem files were used as input in MS<sup>2</sup>ReScore  
41 (<https://github.com/compomics/ms2rescore>), a machine learning-based post-processing tool  
42 that improves upon Percolator rescoring of peptide-to-spectrum matches (PSMs). Here, the  
43 search engine-dependent features of Percolator were appended with MS2 peak intensity  
44 features by comparing the PSM with the corresponding MS<sup>2</sup>PIP-predicted spectrum.  
45 All reported MS<sup>2</sup>ReScore PSM identifications have a q-value < 0.01. No protein grouping  
46 algorithm was applied, and all identified taxa and functions are extracted from the provided  
47 database.

48 **Lab 458:** The Proteome Discoverer 2.5 platform was used (SequestHT + Percolator (MPS)).  
49 Fully tryptic peptides with a minimum length of 6 peptides and a maximum of 2 missed  
50 cleavages were required. Precursor Tolerance of 10.0 ppm, Fragment Ion Tolerance of 0.6 Da.  
51 carbamidomethylation as fixed and methionine oxidation was set as a variable modification. Filtering

52 was performed at a 1% PSM- and peptide-level FDR. The MaxQuant contaminant list was used as  
53 a contaminant database.

54 **Lab 501:** We first appended the database with a set of common contaminants (Global  
55 Proteome Machine Organization common Repository of Adventitious Proteins). Then, we used  
56 MSGF+ (Kim and Pevzner, 2014) to match mass spectra with peptide sequences, with cysteine  
57 carbamidomethylation as a fixed modification, and methionine oxidation, glutamine modified to  
58 pyro-glutamic acid, deamidated asparagine, and deamidated glutamine, as variable  
59 modifications. Peptides were searched for with a Target-Decoy approach, with a 1% false  
60 discovery rate at the peptide spectrum match level. For spectral counts, we summed MS2  
61 spectra that identified a peptide, and normalized all spectral counts to the total spectral counts  
62 per sample.

63 Proteins were quantified using the median spectral count for all proteotypic peptides  
64 (those peptides which uniquely correspond to a protein), specifically using the OpenMS tool  
65 ProteinQuantifier. This approach requires at least one proteotypic peptide, but if more are  
66 identified, those peptides are also used for quantification.

67 **Lab 828:** The raw files were analyzed using Thermal proteome discover. MS/MS spectrums  
68 were searched against provided database using SEQUEST-HT engine. MS/MS spectra  
69 searches were performed as follows: precursor ion tolerance of 10.0 ppm; fragment ion  
70 tolerance of 0.6 Da; carbamidomethyl cysteine was specified as fixed modification, whereas  
71 oxidation (M), deamidation (N/Q), and N-terminal protein acetylation were set as variable  
72 modifications. Trypsin was specified as the proteolytic enzyme, allowing for two missed  
73 cleavages. Percolator-based scoring was chosen to improve the discrimination between correct  
74 and incorrect spectrum identifications, learning from the results of a decoy and target database;  
75 settings were as follows: maximum delta Cn, 0.05; strict false-discovery rate of 0.01 and  
76 validation based on q values.

77 **Lab 902:** SEQUEST-HT was used within Proteome Discoverer 2.2 using the following settings:  
78 maximum missed cleavage 2, minimum peptide length 6, maximum peptide length 122,  
79 precursor mass tolerance 10ppm, fragment mass tolerance 0.6 Dalton; dynamic modifications:  
80 M oxidation, acetyl on N-terminus; static modifications: C carbamidomethyl. Percolator PSM  
81 validator (within Proteome Discoverer) with following settings: maximum Delta Cn 0.05, target  
82 FDR strict 0.01, target FDR relaxed 0.05, validation based on PEP. Scaffold 5.0 used to analyze  
83 Proteome Discoverer generated files with following settings: scoring system: prefiltered mode;  
84 protein grouping: standard experiment wide protein grouping; protein threshold 1.0% FDR;  
85 peptide threshold 0.1% FDR; minimum number of peptides 1.

86 **Lab 932:** Mass spectrometry data were transformed from Thermo RAW format (version 66) to  
87 mzML and Mascot Generic (MGF) formats using ThermoRawFileParser (version 1.2.0,  
88 Hulstaert et al., 2020). Experimental metadata were extracted from mass spectrometry data  
89 using the MARMoSET program (Kiweler et al. 2019). Mascot Server (version 2.6.2, Matrix  
90 Science, LTD) software performed peptide-spectrum matching between experimental data and  
91 a reference sequence database. Reference sequences included a total of 197,824 predicted  
92 protein-coding ORFs from a metagenome assembly. Peptides matching an in-house curated  
93 inventory of contaminant protein sequences, mass standards, and proteolytic enzyme  
94 sequences were removed from the results. Mascot search parameters included the following  
95 settings: +10.0 ppm monoisotopic precursor mass tolerance; +0.6 Da monoisotopic fragment  
96 ion tolerance; one fixed modification (+57 to C residues); two variable modifications (+16 to M  
97 residues, +42 to peptide amino-termini); digestion enzyme trypsin; two missed cleavages;  
98 peptide charges +2-+7; and instrument type: electrospray ionization coupled to fourier-transform  
99 ion cyclotron resonance (ESI-FTICR). Mascot search results containing peptide-spectrum  
100 matches (PSMs) were exported for downstream data analysis. Scaffold Q+S (version 4.8.9) was  
101 used to validate MS/MS-based peptide- and protein-level peptide-spectrum matches (PSM) with  
102 the Peptide Prophet algorithm. Mascot PSM data were imported into Scaffold Q+S with the

103 following settings specified: quantitative metric: spectrum counting; scoring system: use legacy  
104 Peptide Prophet scoring (high mass accuracy); protein grouping: use standard experiment-wide  
105 grouping; optional loading steps: pre-compute false discovery rate (FDR) thresholds; and, use  
106 local gene ontology (GO) annotations (UniProt GO annotation data retrieved 25 JUN 2020).  
107 Scaffold Q+S identification criteria were set at greater/equals >99.9% probability by the Peptide  
108 Prophet algorithm (Keller et al. *Anal. Chem.* 2002.) and >99.9% probability by the Protein  
109 Prophet algorithm (Nesvizhskii et al., *Anal. Chem.* 2003) with >2 peptides at the protein level.

110  
111 **Lab 957:** MSFragger 3.3 searches were performed with FragPipe 16.0 and Philosopher 4.0.0. A  
112 concatenated target/reverse database was searched with a 50 PPM precursor and 0.4 Da  
113 fragment mass tolerance. Automatic mass calibration and parameter optimization was enabled  
114 and precursor mass errors for up to +2 neutrons were considered. Peptide candidates were  
115 generated from database protein sequences assuming tryptic digestion, allowing for up to one  
116 missed cleavage. Peptides were required to have between 8-50 amino acids and range from  
117 500 to 5000 m/z. Cysteines were assumed to be fully carbamidomethylated, and peptides were  
118 searched considering variable n-terminal pyroglutamic acid formation and methionine oxidation.  
119 PeptideProphet was used for FDR validation with the following default options: "--decoy probs",  
120 "--ppm", "--accmass", "--nonparam", and "--expectscore", which allow for additional high-mass  
121 accuracy analysis and non-parametric distribution fitting. ProteinProphet was used for protein-  
122 level FDR validation with the following default option: "--maxppmdiff 2000000". Filtering was  
123 performed using a 1% peptide-level and a 1% protein-level FDR threshold.

## 124 **Supplementary References**

125  
126  
127 Hulstaert, N., Shofstahl, J., Sachsenberg, T., Walzer, M., Barsnes, H., Martens, L. and Perez-Riverol, Y.,  
128 2019. ThermoRawFileParser: modular, scalable, and cross-platform RAW file conversion. *Journal of*  
129 *Proteome Research*, 19(1), 537-542.

130  
131 Keller, A., Nesvizhskii, A.I., Kolker, E. and Aebersold, R., 2002. An explanation of the Peptide Prophet  
132 algorithm developed. *Anal. Chem*, 74(2002), 5383-5392.

133  
134 Kim, S. and Pevzner, P.A., 2014. MS-GF+ makes progress towards a universal database search tool for  
135 proteomics. *Nature Communications*, 5(1), 5277.

136  
137 Kiweler, M., Looso, M. and Graumann, J., 2019. MARMoSET—extracting publication-ready mass  
138 spectrometry metadata from RAW files. *Molecular & Cellular Proteomics*, 18(8), 1700-1702.

139  
140 Nesvizhskii, A.I., Keller, A., Kolker, E. and Aebersold, R., 2003. A statistical model for identifying proteins  
141 by tandem mass spectrometry. *Analytical Chemistry*, 75(17), 4646-4658.

142  
143

144

145 **Table S1.** Participants in wet-lab (W) and informatic (I) components of the 2020-2021 OCB

146 ocean intercomparison study.

| Institution(s)                              | Participants                                                          | Role |
|---------------------------------------------|-----------------------------------------------------------------------|------|
| College of Charleston & NIST                | Mike Janech, Ben Neely                                                | W    |
| Dalhousie University                        | Erin Bertrand, Scott McCain, Elden Rowland                            | W/I  |
| Ghent University                            | Tim Van Den Bossche, Lennart Martens                                  | I    |
| Naval Research Laboratory                   | Judson Hervey, Dasha Leary, Jaimee Compton, Sophie Colston, Gary Vora | I    |
| Rowan University and Rutgers University     | Eli Moore, Haiyan Zheng                                               | W    |
| Oak Ridge National Laboratory               | Bob Hettich, Samantha Peters, Richard Giannone                        | W/I  |
| Ohio State University                       | Brian Searle                                                          | I    |
| TU Delft                                    | Martin Pabst and Hugo Kleikamp                                        | I    |
| University of Chicago                       | Jake Waldbauer                                                        | W    |
| University of Minnesota                     | Pratik Jagtap, Tim Griffin, Subina Mehta                              | I    |
| University of Vienna                        | Gerhard J. Herndl and Zihao Zhao                                      | W/I  |
| University of Washington<br>Genome Sciences | Brook Nunn                                                            | W    |
| University of Washington<br>Oceanography    | Rick Keil, Jacqui Neibauer, Megan Duffy                               | W    |
| Woods Hole Oceanographic Institution        | Mak Saito, Matthew McIlvin, Dawn Moran                                | W/I  |

147

148

149 **Table S2.** Metadata for laboratory intercomparison samples. Volumes filtered through 142 mm  
150 pump heads and corresponding volume per slice.

151

| Pump / Pump head / Sample name | Volume filtered (L) | Volume per 1/8 <sup>th</sup> slice (L) |
|--------------------------------|---------------------|----------------------------------------|
| Pump 2L / BATS 1 / pump 1A     | 221.6*              | 27.7                                   |
| Pump 2R / BATS 2 / pump 1B     | 167.3*              | 20.9                                   |
| Pump 1L / BATS 3 / pump 2A     | 235.1+              | 29.4                                   |
| Pump 1R / BATS 4 / pump 2B     | 211.1+              | 26.3                                   |

152 \* Pump 1 total gauge = 447 L, sum of two pump gauges = 446.2 L

153 + Pump 2 total gauge = 478 L, sum of two gauges = 388.9 L, discrepancy of 89 L, gauges on pump head are assumed more accurate, as leaks in  
154 system could create the additional flow for the total pump gauge.

155

156 **Table S3.** Sample metadata and accession numbers.

| Expedition ID,<br>Sample name          | Location (Lat/Long) | Depth (m) | Date<br>(mm-dd-<br>yyyy) | Time (UTC;<br>sampler<br>recovery) | ProteomXchange ID                                                       |
|----------------------------------------|---------------------|-----------|--------------------------|------------------------------------|-------------------------------------------------------------------------|
| <i>Laboratory<br/>Intercomparison</i>  | --                  | --        | --                       | --                                 | --                                                                      |
| BATS 348, Lab 127                      | 31.66 N 64.166 W    | 80        | 06-16-2018               | 08:00:00                           | PXD043218                                                               |
| BATS 348, Lab 135                      | 31.66 N 64.166 W    | 80        | 06-16-2018               | 08:00:00                           | PXD043218                                                               |
| BATS 348, Lab 209                      | 31.66 N 64.166 W    | 80        | 06-16-2018               | 08:00:00                           | PXD043218                                                               |
| BATS 348, Lab 438                      | 31.66 N 64.166 W    | 80        | 06-16-2018               | 08:00:00                           | PXD043218                                                               |
| BATS 348, Lab 593                      | 31.66 N 64.166 W    | 80        | 06-16-2018               | 08:00:00                           | PXD043218                                                               |
| BATS 348, Lab 652                      | 31.66 N 64.166 W    | 80        | 06-16-2018               | 08:00:00                           | PXD043218                                                               |
| BATS 348, Lab 729                      | 31.66 N 64.166 W    | 80        | 06-16-2018               | 08:00:00                           | PXD043218                                                               |
| BATS 348, Lab 774                      | 31.66 N 64.166 W    | 80        | 06-16-2018               | 08:00:00                           | PXD043218                                                               |
| BATS 348, Lab 811                      | 31.66 N 64.166 W    | 80        | 06-16-2018               | 08:00:00                           | PXD043218                                                               |
| BATS 348, paired<br>metagenomic sample | 31.66 N 64.166 W    | 80        | 06-16-2018               | 08:00:00                           | Bioproject Accession:<br>PRJNA932835; SRA<br>submission:<br>SUB12819843 |
| <i>Informatics<br/>intercomparison</i> | --                  | --        | --                       | --                                 | --                                                                      |
| AE1913, Ocean 8<br>Clio020             | 33.128 N 65.967 W   | 120       | 06-19-2019               | 16:56:57                           | PXD044234                                                               |
| AE1913, Ocean 11<br>Clio020            | 33.128 N 65.967 W   | 20        | 06-19-2019               | 16:56:57                           | PXD044234                                                               |

157

158

159

160

161 **Table S4. Experimental guidelines in ocean metaproteome intercomparison project**

| Parameter                | Guideline(s)                                                                                                                                               |
|--------------------------|------------------------------------------------------------------------------------------------------------------------------------------------------------|
| Extraction and digestion | Extraction of participant's choice, trypsin digestion                                                                                                      |
| Chromatography           | 1-dimension of chromatography, at least 60 minutes of separation time, triplicate analyses                                                                 |
| Total protein injected   | 1 µg suggested. Allowable range 0.25 - 2 µg                                                                                                                |
| Isotope Tagging          | No isotope tags                                                                                                                                            |
| Mass spectrometry        | Data Dependent Analyses (DDA), participant's choice of parameters                                                                                          |
| Informatics pipeline     | Participants choice of software tools. Report in Spectral Counts. Protein and peptide results to be <1 % false discovery rate (FDR), 1 peptide per protein |

162  
163

164  
165  
166

**Table S5.** Laboratory intercomparison sample extraction method and LC method.

| Lab ID | Extraction Method                                                                                                                                                             | LC method                                                                                                                                                                                                                                                                                                                                                                                                                                                                                                                                                                                   |
|--------|-------------------------------------------------------------------------------------------------------------------------------------------------------------------------------|---------------------------------------------------------------------------------------------------------------------------------------------------------------------------------------------------------------------------------------------------------------------------------------------------------------------------------------------------------------------------------------------------------------------------------------------------------------------------------------------------------------------------------------------------------------------------------------------|
| 127    | 2% SDS buffer 95oC; S-Trap purification and digestion                                                                                                                         | 180 min run, 5% B (0.1% FA in acetonitrile) to 30% B over 135 min, 30% B to 55% B over 12 min. A solvent 0.1% formic acid in water                                                                                                                                                                                                                                                                                                                                                                                                                                                          |
| 135    | 5% SDS + 0.1M TEAB, tip sonication, S-trap digestion, c18 SPE                                                                                                                 | --                                                                                                                                                                                                                                                                                                                                                                                                                                                                                                                                                                                          |
| 209    | 2% SDS, 95°C + sonication; acetone precipitation; FASP cleanup & digestion                                                                                                    | 270 min run; 98% A (0.1 formic acid in water)/2% B (0.1% formic acid in acetonitrile) to 30% B over 130min, to 70% B over 45min                                                                                                                                                                                                                                                                                                                                                                                                                                                             |
| 438    | 1% SDS buffer 95oC; SP3 bead purification and digestion                                                                                                                       | 200 min run, 95% A (0.1 formic acid in water) to 95% B (0.1% formic acid in acetonitrile) nonlinear over 170 min, with a flow rate of 500nM min <sup>-1</sup> --                                                                                                                                                                                                                                                                                                                                                                                                                            |
| 593    | 7M Urea 2M Thiourea, 1% DTT 2% CHAPS, vortex and sonicate, spin, ultrafiltration 30kD, filter aided sample prep (FASP) in solution digestion, desalt with C18 tips            | 180min gradient from 98% solution A (0.1% formic acid) and 2% solution B (90% acetonitrile and 0.1% formic acid) at 0 min to 40% solution B at 180 min with a flow rate of 300 nL min <sup>-1</sup> .                                                                                                                                                                                                                                                                                                                                                                                       |
| 652    | 5% SDS + 0.1M TEAB applied to filters in ziplock, tip sonication, S-trap digestion, c18 SPE                                                                                   | 120 min run, 5% B (0.1% FA in acetonitrile) to 30% B over 90 min, 30% B to 55% B over 10 min. A solvent 0.1% formic acid in water                                                                                                                                                                                                                                                                                                                                                                                                                                                           |
| 729    | 4% SDS sonication, protein aggregation capture                                                                                                                                | a linear organic gradient of 100% solvent A (95% water, 5% acetonitrile, 0.1% formic acid) to 25% solvent B (70% acetonitrile, 30% water, and 0.1% formic acid) for 180 minutes                                                                                                                                                                                                                                                                                                                                                                                                             |
| 774    | 2.1% SDS (2X Laemmli buffer); SDS gel plug; 8M Urea; sonication                                                                                                               | Sample was loaded on to a fused silica trap column (Acclaim PepMap 100, 75umx2cm, ThermoFisher). After washing for 5 min at 5 µl/min with 0.1% TFA, the trap column was brought in-line with an analytical column (Nanoease MZ peptide BEH C18, 130A, 1.7um, 75umx250mm, Waters) for LC-MS/MS. Peptides were fractionated at 300 nL/min using a segmented linear gradient 4-15% B in 30min (where A: 0.2% formic acid, and B: 0.16% formic acid, 80% acetonitrile), 15-25%B in 40min, 25-50%B in 44min, and 50-90%B in 11min. Solution B then returns at 4% for 5 minutes for the next run. |
| 811    | Bead beating and 3 freeze thaw cycles with Ammonium bicarbonate (50mM) and EDTA (5mM), centrifugation, then TCEP, iodoacetamide, DTT, trypsin, desalted with C18 spin columns | Solvents of 100% LC/MS grade water with 0.1% formic acid (A) and 100% LC/MS grade acetonitrile with 0.1% formic acid (B) were used to elute peptides over a 90-minute gradient from 5-35% solvent B                                                                                                                                                                                                                                                                                                                                                                                         |



167  
 168 **Table S6.** Chromatographic parameters and mass spectrometer and resolution employed. See  
 169 Table S5 for LC method and Table S7 for mass spectrometer parameters.

| Lab ID | Column Length (cm) | Column Width (µm) | LC Resin                                         | LC flow rate (nl/min) | LC gradient time (min) | Trap Column or Direct Injection | LC system            | Mass Spectrometer           | MS1 resolution    |
|--------|--------------------|-------------------|--------------------------------------------------|-----------------------|------------------------|---------------------------------|----------------------|-----------------------------|-------------------|
| 127    | 50                 | 100               | C18 Jupiter                                      | 250                   | 147                    | direct                          | Dionex LC            | QExactive                   | 35,000 or 140,000 |
| 135    | 25                 | 75                | C18 Acclaim PepMap RSLC 2µm                      | 300                   | 65                     | trap                            | Dionex LC 3000       | Lumos Tribid                | 60,000            |
| 209    | 200                | 100               | C18 monolith (GL Sciences)                       | 360                   | 188                    | trap                            | Dionex 3000          | Orbitrap Elite              | 120,000           |
| 438    | 25                 | 100               | 3 µm C18 beads (Dr. Maisch)                      | 500                   | 200                    | trap                            | Dionex 3000          | Fusion Tribid               | 240,000           |
| 593    | 50                 | 75                | 2µm C18 beads                                    | 300                   | 270                    | --                              | Dionex UltiMate 3000 | QExactive                   | 120,000           |
| 652    | 30                 | 75                | 3 µm C18 beads (Dr. Maisch)                      | 250                   | 90                     | trap                            | Thermo Easy-LC UPLC  | QExactive                   | 70,000            |
| 729    | 15                 | 75                | 1.7µm Kinetex C-18 (Phenomenex)                  | 150                   | 180                    | trap                            | Vanquish Ultra-HPLC  | QExactive Plus              | 70,000            |
| 774    | 25                 | 75                | Peptide BEH                                      | 300                   | 120                    | trap                            | Dionex RSLC          | Thermo Eclipse              | 120,000           |
| 811    | 37                 | 75                | C18 particles (Magic C18AQ, 100 Å, 5µm; Michrom) | 300                   | 90                     | precolumn                       | Easy-nLC 1200        | Thermo Q Exactive Plus HRMS | 70,000            |

170

171

172 **Table S7.** Chromatographic parameters and mass spectrometer and resolution employed. See

173 Table S5 for LC method and Table S6 for chromatographic parameters and mass spectrometer

174 and resolution employed.

| Lab ID | MS1 AGC target | Max Injection Time (ms) | MS1 Scan Range | MS2 Detector | Resolution or Scan rate | Minimum AGC target | Max Injection Time (ms) | Loop count (N) or cycle time (s) | Isolation Window | Activation Type | Collision Energy | Charge States Included | Dynamic Exclusion (s) |
|--------|----------------|-------------------------|----------------|--------------|-------------------------|--------------------|-------------------------|----------------------------------|------------------|-----------------|------------------|------------------------|-----------------------|
| 127    | 3.00E+06       | 100                     | 400-2000       | orbitrap     | 17,500                  | 5.00E+03           | 60                      | Top N 12, Top N 8                | 2                | HCD             | 27               | 2,3,4                  | 30                    |
| 135    | 4.00E+05       | 50                      | 375-1500       | orbitrap     | 15,000                  | 2.00E+05           | 30                      | TopN, 3sec                       | 1.3              | HCD             | 32               | 2,3,4,5,6              | 60                    |
| 209    | 1.00E+06       | 100                     | 300-1800       | ion trap     | rapid                   | 1.00E+04           | 100                     | TopN 15                          | 2                | CID             | 35               | >1                     | 30                    |
| 438    | 4.00E+05       | 50                      | 380-1280       | ion trap     | normal rate             | 2.00E+04           | 150                     | 2 s cycle                        | 1.6              | HCD             | 30               | 2,3,4,5,6,7,8          | 15                    |
| 593    | --             | --                      | 350-1800       | orbitrap     | --                      | --                 | --                      | 20                               | --               | CID             | --               | >1                     | 30                    |
| 652    | 1.00E+06       | 100                     | 400-1400       | orbitrap     | 35,000                  | 5.00E+04           | 50                      | 20                               | 1.2              | HCD             | 30               | 2,3,4,5                | 10                    |
| 729    | 1.00E+06       | 25                      | 300-1500       | orbitrap     | 17,500                  | 1.00E+05           | 50                      | 20                               | 1.8              | HCD             | 27               | 2,3,4,5                | 30                    |
| 774    | 8.00E+05       | auto                    | 375-1500       | orbitrap     | 15,000                  | 1.00E+05           | 50                      | 3                                | 1.2              | HCD             | 30               | 2-7                    | 60                    |
| 811    | 5.00E+04       | 50                      | 375-1575       | orbitrap     | 17,500                  | 5.00E+04           | 50                      | 20                               | 1.2              | HCD             | 25               | 2,3,4,5                | 30                    |

175

176

177

178

179 **Table S8.** Participant laboratory results: User provided results from diverse informatic pipelines.

180 NA – not available. Multiple values reported if protein groupings were used, based on the output

181 formats and protein inference methods of the various informatic pipelines used.

| Lab | Total Unique Peptides | Protein IDs |
|-----|-----------------------|-------------|
| 127 | 22382                 | 3520        |
| 135 | 9797                  | NA          |
| 209 | 2363                  | 4359 / 1049 |
| 438 | 15903                 | 5771        |
| 593 | 131                   | 89          |
| 652 | 11979                 | 2089        |
| 729 | 11204                 | 4907        |
| 774 | 18859                 | 5946        |
| 811 | 3515                  | NA          |

182

183 **Table S9.** Participant laboratory results using the single pipeline re-analysis. Raw data files  
184 were processed SEQUEST HT and Scaffold resulted in these sums of total unique peptides,  
185 total proteins, and protein groups.

| Lab | Total Unique Peptides | Total Protein IDs | Protein Groups |
|-----|-----------------------|-------------------|----------------|
| 135 | 9600                  | 3919              | 3533           |
| 209 | 3354                  | 1586              | 1461           |
| 438 | 15646                 | 6221              | 5621           |
| 593 | 0                     | 0                 | 0              |
| 652 | 9106                  | 3518              | 3189           |
| 729 | 6626                  | 3522              | 3202           |
| 774 | 16500                 | 5676              | 5111           |
| 811 | 14                    | 12                | 12             |
| 127 | 12615                 | 5080              | 4595           |

186

187 **Table S10.** Participant laboratory results passed through the single pipeline re-analysis, using  
188 alternate chromatographic techniques. Raw data files were processed SEQUEST HT and  
189 Scaffold resulted in these sums of total unique peptides, total proteins, and protein groups.

| Lab             | Total Unique Peptides | Total Protein IDs |
|-----------------|-----------------------|-------------------|
| Alt-1 (12h run) | 7060                  | 2832              |
| Alt-2 (2D)      | 18477                 | 7765              |
| Alt-3 (2D)      | 5852                  | 2746              |

190

191 **Table S11.** Informatic intercomparison study: anonymous laboratory identification numbers,  
 192 software used, and results. NA – not available.

193

| ID  | Software                                       | Unique Peptides |           |
|-----|------------------------------------------------|-----------------|-----------|
|     |                                                | Oceans 8        | Oceans 11 |
| 109 | Peaks Studio X                                 | 4522            | 4898      |
| 321 | SearchGUI / Peptide Shaker                     | 2768            | 7389      |
| 321 | MaxQuant                                       | 3342            | 4751      |
| 362 | XITandem / SearchGUI                           | 4890            | 8079      |
| 458 | SEQUEST-HT / Percolator                        | 6369            | 8288      |
| 501 | MSGF+ OpenMS                                   | 4025            | 7463      |
| 828 | SEQUEST-HT PD                                  | NA              | NA        |
| 902 | SEQUEST-HT / Percolator                        | 4653            | 7649      |
| 932 | MASCOT                                         | 1724            | 3019      |
| 957 | MsFragger / PeptideProphet /<br>ProteinProphet | 3687            | 6144      |

194

195

196

197 **Figure S1.** Results from user submitted data reports for laboratory intercomparison. a) Total  
 198 number of unique peptide identifications by laboratory. A total of 35715 unique peptides were  
 199 detected across all six laboratories. Note any peptides with PTMs were removed and not  
 200 counted. b) Total number of protein identifications, note that some laboratory groups did not  
 201 provide protein results (135 and 811). c) Pairwise comparisons of shared peptides between six  
 202 laboratories ranged from 3844 to 10877 and averaged 7142 +/- 2074 identified peptides,  
 203 demonstrating reproducibility of peptides identifications between laboratories. Note that PTMs  
 204 were not taken into account for the uniqueness of peptides.

205  
 206  
 207  
 208

209

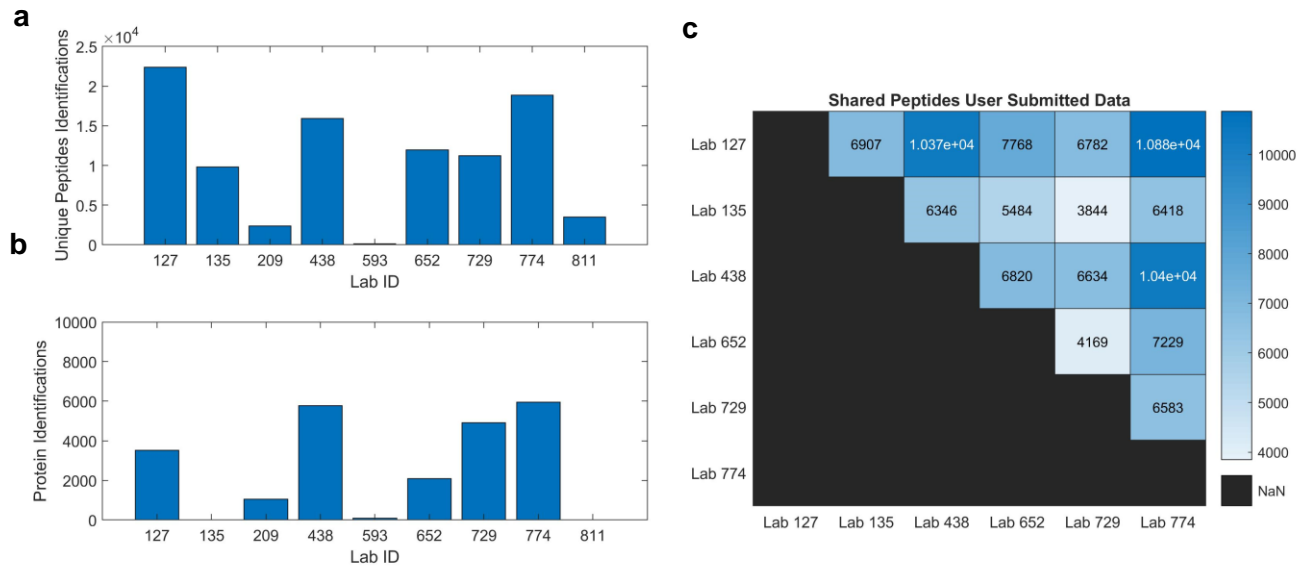

212

213

214

215 **Figure S2.** Results of pair-wise two-way linear regression analyses for re-analysis of submitted  
 216 raw data from laboratory intercomparison, corresponding to Figure 4.

217

218

219

220

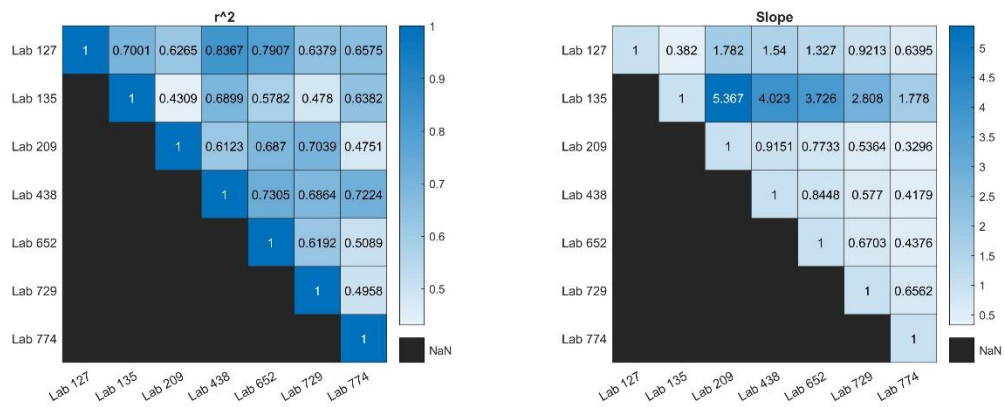



221 **Figure S3. Quantitative Sørensen similarity analysis.** Sørensen similarity analysis on full  
 222 protein dataset. See Fig. 6 for analysis of top 1000 proteins.

223

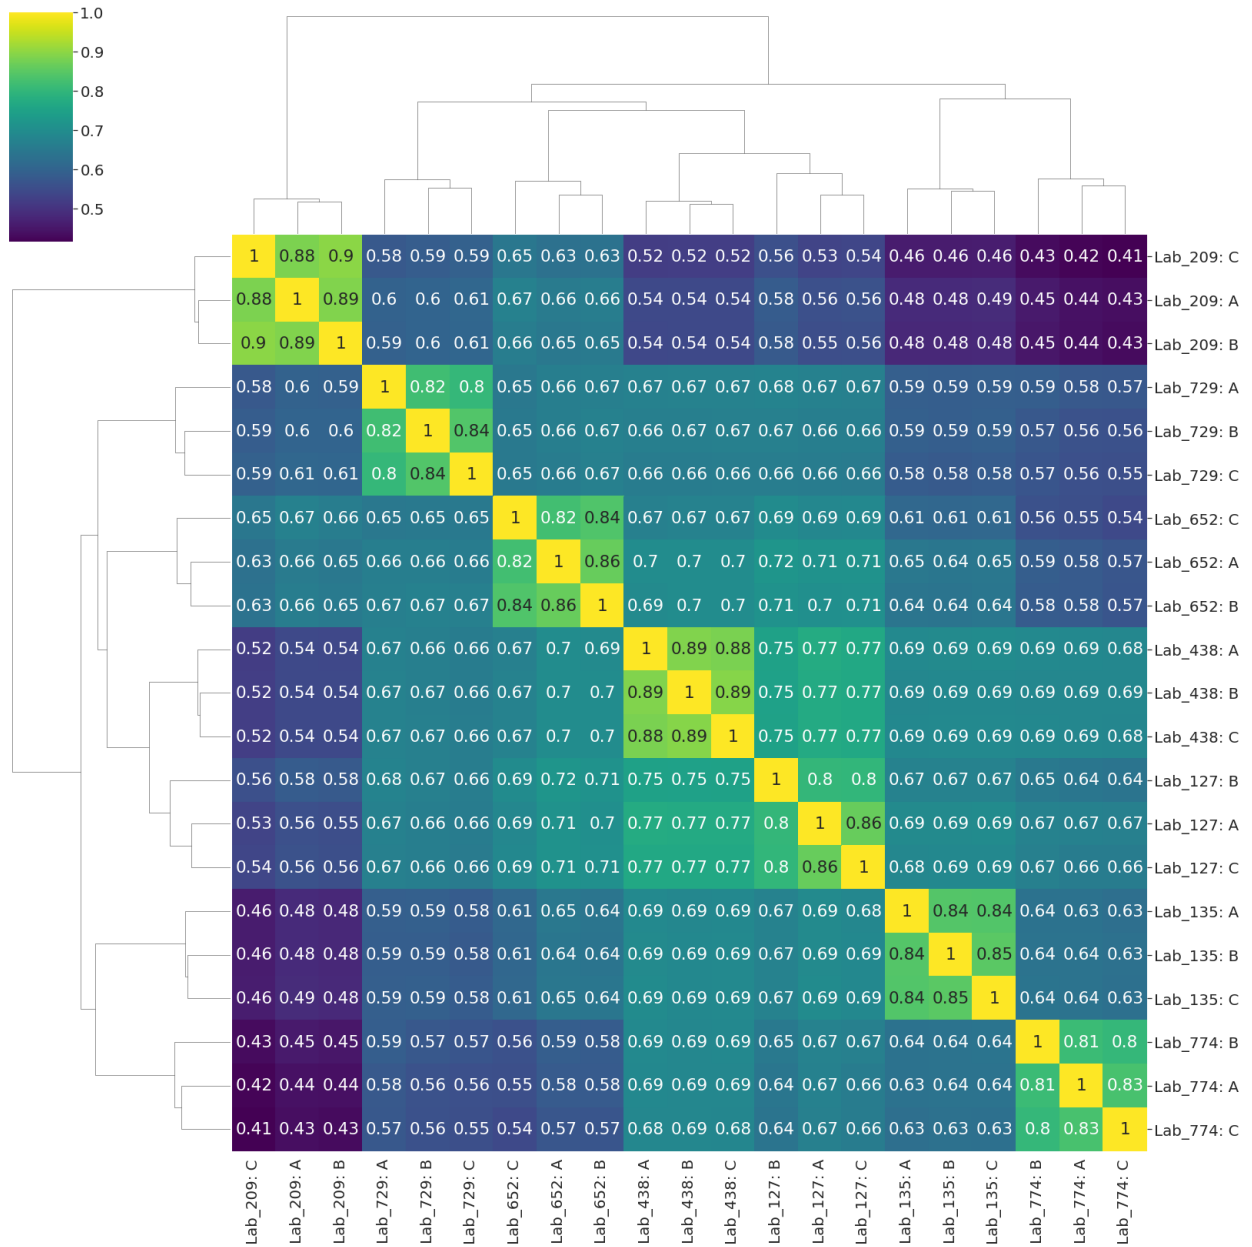

224

225

226
